# Supplementary material
Source: PubMed Central journal article supplement (PMC1798221)
Supplement: annrheumd_ard.2005.044909_1.pdf [file annrheumd_ard.2005.044909_1.pdf]

Supplementary table 5. Complete data of individual genes from six WG tissue samples

Adisplays the data summarized according to the predominant VH germline gene families found in the WG tissues.

| patient # | VH germline gene | homology (% to germline) | CDR FR |     |   |     | R/H/ K | CDR3 length (amino acids) | annotation       |
|-----------|------------------|--------------------------|--------|-----|---|-----|--------|---------------------------|------------------|
|           |                  |                          | R      | SR  | S | E/D |        |                           |                  |
| 2         | SA 6-71-2        | 94                       | 4      | 17  | 2 | 2   | 0      | 9                         |                  |
| 2         | SC 6-21-2        | 88                       | 6      | 111 | 1 | 1   | 1      |                           | not functional   |
| 6         | Scy 133 1-2      | 95                       | 3      | 05  | 4 | 1   | 0      | 21                        |                  |
| 6         | Scy14 7 1-2      | 93                       | 3      | 09  | 1 | 1   | 0      | 11                        |                  |
| 1         | J2-13 3-7        | 96                       | 3      | 21  | 3 | 1   | 0      | 11                        |                  |
| 1         | J3-22 3-7        | 94                       | 5      | 07  | 2 | 1   | 0      | 11                        |                  |
| 2         | SF 8 3-7         | 91                       | 9      | 15  | 7 | 0   | 1      | 10                        |                  |
| 3         | Wi- 9V 3-7       | 97                       | 2      | 12  | 1 | 0   | 0      | 13                        |                  |
| 5         | Ko208 3-7        | 97                       | 3      | 12  | 0 | 0   | 0      | 11                        |                  |
| 5         | Ko137 3-7        | 92                       | 6      | 26  | 5 | 0   | 2      | 8                         |                  |
| 1         | J1-18 3-23       | 94                       | 8      | 41  | 2 | 0   | 0      | 12                        |                  |
| 1         | J2-19 3-23       | 89                       | 8      | 48  | 5 | 2   | 1      | 10                        |                  |
| 1         | J2-20 3-23       | 89                       | 9      | 58  | 3 | 1   | 1      | 14                        |                  |
| 1         | J3-15 3-23       | 92                       | 8      | 16  | 5 | 0   | 0      | 14                        |                  |
| 2         | SA4-4 3-23       | 93                       | 6      | 16  | 0 | 1   | 1      | 11                        |                  |
| 3         | Wi- 13V 3-23     | 94                       | 7      | 04  | 1 | 1   | 2      | 14                        |                  |
| 4         | Ro113 3-23       | 99                       | 0      | 11  | 0 | 0   | 0      | 18                        | related to Ro112 |
| 4         | Ro112 3-23       | 95                       | 4      | 33  | 1 | 0   | 0      | 18                        | related to Ro113 |
| 4         | Ro115 3-23       | 96                       | 2      | 12  | 5 | 0   | 0      | 22                        |                  |
| 4         | Ro118 3-23       | 91                       | 6      | 111 | 3 | 1   | 3      | 16                        | not functional   |
| 5         | Ko205 3-23       | 93                       | 4      | 17  | 2 | 1   | 0      | 10                        |                  |
| 6         | Scy07 3-23       | 92                       | 5      | 36  | 5 | 1   | 2      | 14                        | related to Scy64 |
| 6         | Scy54 3-23       | 95                       | 6      | 02  | 3 | 0   | 0      | 6                         |                  |
| 6         | Scy49 3-23       | 96                       | 1      | 35  | 1 | 0   | 0      | 12                        |                  |
| 1         | J2-4 3-30        | 99                       | 2      | 00  | 0 | 0   | 2      | 14                        |                  |
| 1         | J2-6 3-30        | 90                       | 8      | 210 | 3 | 0   | 1      |                           | not functional   |
| 1         | J2-9 3-30        | 94                       | 2      | 04  | 2 | 0   | 0      | 15                        |                  |
| 1         | J2-25 3-30       | 86                       | 9      | 315 | 7 | 2   | 0      | 17                        |                  |
| 1         | J2-26 3-30       | 98                       | 2      | 02  | 0 | 0   | 0      |                           | not functional   |
| 1         | J3-12 3-30       | 97                       | 2      | 13  | 1 | 0   | 0      | 13                        |                  |
| 1         | J3-20 3-30       | 87                       | 5      | 311 | 6 | 0   | 0      | 18                        |                  |
| 3         | Wi-52 3-30       | 98                       | 2      | 11  | 0 | 1   | 0      | 17                        |                  |
| 3         | Wi-1V 3-30       | 99                       | 0      | 01  | 0 | 0   | 0      | 13                        |                  |
| 4         | Ro108 3-30       |                          |        |     |   | 0   | 0      |                           | not functional   |

Adisplays the data summarized according to the predominant VH germline gene families found in the WG tissues.

| patient | VH            | homology        | CDR FR |     |     |     | R/H/ | CDR3 length   | annotation          |
|---------|---------------|-----------------|--------|-----|-----|-----|------|---------------|---------------------|
| #       | germline gene | (% to germline) | R      | SR  | S   | E/D | K    | (amino acids) |                     |
| 4       | Ro109 3-30    | 96              | 4      | 03  | 3   | 0   | 1    | 18            |                     |
| 4       | Ro 39 3-30    | 90              | 4      | 211 | 5   | 1   | 0    | 13            |                     |
| 5       | Ko01 3-30     | 89              | 8      | 08  | 4   | 0   | 1    | 14            |                     |
| 5       | Ko135 3-30    | 91              | 3      | 27  | 5   | 0   | 0    | 13            |                     |
| 1       | J2-2 4-34     | 94              | 4      | 07  | 2   | 2   | 0    | 12            |                     |
| 1       | J2-21 4-34    | 86              | 6      | 215 | 102 |     | 1    | 12            |                     |
| 1       | J2-23 4-34    | 93              | 2      | 29  | 2   | 0   | 0    | 17            |                     |
| 1       | J3-19 4-34    | 88              | 7      | 19  | 101 |     | 3    | 19            |                     |
| 1       | J3-21 4-34    | 97              | 1      | 04  | 1   | 0   | 0    | 16            |                     |
| 2       | SE9-4 4-34    | 100             | 0      | 00  | 0   | 0   | 0    |               | not functional      |
| 3       | Wi-76 4-34    | 98              | 2      | 01  | 0   | 1   | 0    | 12            |                     |
| 3       | Wi-77 4-34    | 99              | 1      | 01  | 0   | 1   | 0    | 12            |                     |
| 3       | Wi-30V 4-34   | 99              | 1      | 01  | 0   | 1   | 0    | 12            |                     |
| 4       | Ro 66 4-34    | 98              | 1      | 01  | 4   | 0   | 0    | 21            | not functional      |
| 5       | Ko150 4-34    | 93              | 4      | 17  | 1   | 0   | 0    | 17            |                     |
| 6       | Scy 25 4-34   | 98              | 1      | 02  | 2   | 1   | 0    | 12            |                     |
| 6       | Scy 75 4-34   | 91              | 3      | 110 | 4   | 1   | 0    | 19            |                     |
| 6       | Scy 78 4-34   | 97              | 1      | 02  | 6   | 1   | 0    | 14            |                     |
| 6       | Scy12 8 4-34  | 98              | 0      | 02  | 1   | 0   | 0    | 18            |                     |
| 1       | J1-14 4-59    | 92              | 4      | 06  | 3   | 0   | 0    | 12            |                     |
| 1       | J2-3 4-59     | 91              | 4      | 35  | 7   | 2   | 0    | 12            |                     |
| 1       | J2-14 4-59    | 97              | 1      | 00  | 1   | 0   | 1    | 13            |                     |
| 1       | J3-8 4-59     | 91              | 6      | 16  | 2   | 0   | 0    | 12            |                     |
| 3       | Wi-62 4-59    | 95              | 1      | 15  | 3   | 0   | 0    | 19            |                     |
| 3       | Wi-20V 4-59   | 95              | 1      | 14  | 3   | 0   | 0    | 19            |                     |
| 6       | Scy 37 4-59   | 95              | 4      | 14  | 4   | 0   | 0    | 14            | related to Scy66,83 |
| 6       | Scy 66 4-59   | 97              | 2      | 06  | 0   | 0   | 0    | 14            | related to Scy37,83 |
| 6       | Scy 83 4-59   | 93              | 5      | 04  | 6   | 0   | 0    | 14            | related to Scy37,66 |
| 6       | Scy 74 4-59   | 97              | 3      | 03  | 1   | 1   | 0    | 18            |                     |
| 6       | Scy 86 4-59   | 97              | 3      | 11  | 3   | 1   | 0    | 17            |                     |
| 6       | Scy11 1 4-59  | 95              | 5      | 06  | 3   | 2   | 0    | 22            |                     |

B shows the remaining data grouped by their patient's origin

| patient | VH | homology | CDR FR |  |  |  | R/H/ | CDR3 length | annotation |
|---------|----|----------|--------|--|--|--|------|-------------|------------|
|---------|----|----------|--------|--|--|--|------|-------------|------------|

|   |       | germline | (% to     | R  | SR  | S  | E/D | R/H/K | (amino |                  |
|---|-------|----------|-----------|----|-----|----|-----|-------|--------|------------------|
|   |       | gene     | germline) |    |     |    |     |       | acids) |                  |
| 1 | J3-17 | 3-48     | 98        | 1  | 04  | 1  | 0   | 0     | 13     |                  |
| 1 | J3-13 | 3-64     | 94        | 4  | 17  | 3  | 1   | 0     | 12     |                  |
| 1 | J3-7  | 3-73     | 94        | 4  | 0   |    | 0   | 0     |        | frameshift       |
| 1 | J2-5  | 3-9      | 92        | 6  | 2   |    | 1   | 0     |        | frameshift       |
| 1 | J2-12 | 4-30     | 93        | 7  | 05  | 4  | 1   | 0     | 9      | related to J2-8  |
| 1 | J2-8  | 4-30     | 92        | 4  | 05  | 4  | 1   | 0     | 9      |                  |
| 1 | J3-10 | 4-31     | 87        | 8  | 28  | 7  | 1   | 0     | 13     |                  |
| 1 | J3-18 | 4-4      | 95        | 3  | 03  | 5  | 0   | 0     | 15     |                  |
| 1 | J2-7  | 4-61     | 90        | 8  | 36  | 9  | 0   | 1     | 13     |                  |
| 1 | J2-10 | 4-61     | 88        | 8  | 111 | 7  | 1   | 0     | 19     |                  |
| 1 | J2-15 | 4-61     | 86        | 6  | 39  | 12 | 1   | 0     | 13     |                  |
| 1 | J3-3  | 4-61     | 87        | 11 | 111 | 8  | 1   | 2     | 11     |                  |
| 1 | J3-9  | 4-61     | 90        | 9  | 110 | 3  | 2   | 1     | 10     |                  |
| 2 | SA6-4 | 1-18     | 92        | 6  | 35  | 3  | 2   | 1     | 18     |                  |
| 2 | SA6-2 | 1-3      | 96        | 3  | 07  | 1  | 1   | 1     |        | not functional   |
| 2 | SE7-4 | 1-3      | 92        | 4  | 17  | 1  | 1   | 2     |        | not functional   |
| 2 | SF7   | 1-58     | 95        | 3  | 16  | 0  | 0   | 2     | 14     |                  |
| 2 | SC6-4 | 1-69     | 91        | 5  | 05  | 5  | 0   | 1     | 14     |                  |
| 2 | SD7-1 | 1-69     | 91        | 5  | 110 | 4  | 0   | 1     | 12     |                  |
| 2 | SA5-2 | 2-5      | 97        | 2  | 0   |    | 0   | 0     |        | not functional   |
| 2 | SA5-6 | 2-5      | 85        | 5  | 08  | 4  | 1   | 0     | 11     |                  |
| 2 | SC5-4 | 2-5      | 93        | 4  | 06  | 8  | 0   | 0     | 14     |                  |
| 2 | SD2-3 | 2-5      | 97        | 1  | 01  | 2  | 0   | 0     | 10     |                  |
| 2 | SF2   | 2-5      | 94        | 5  | 06  | 4  | 1   | 0     | 21     |                  |
| 2 | SC6-1 | 2-70     | 96        | 2  | 03  | 0  | 0   | 0     |        | not functional   |
| 2 | SF6   | 3-13     | 97        | 5  | 03  | 1  | 0   | 1     | 15     |                  |
| 2 | SA4-1 | 3-43     | 92        | 6  | 04  | 3  | 1   | 0     | 20     |                  |
| 2 | SF4   | 3-48     | 91        | 5  | 14  | 2  | 2   | 1     | 14     |                  |
| 2 | SE3-5 | 3-53     | 95        | 2  | 36  | 2  | 0   | 1     | 11     |                  |
| 2 | SB3-1 | 3-74     | 91        | 7  | 05  | 5  | 0   | 1     | 9      |                  |
| 2 | SF1   | 4-30     | 95        | 8  | 14  | 2  | 0   | 0     | 9      |                  |
| 2 | SF5   | 4-31     | 98        | 0  | 11  | 1  | 0   | 0     | 15     |                  |
| 2 | SF12  | 4-31     | 83        | 5  | 19  | 6  | 0   | 1     | 11     |                  |
| 2 | SA3-5 | 4-4      | 94        | 6  | 02  | 2  | 1   | 1     | 13     |                  |
| 2 | SD4-2 | 4-61     | 94        | 4  | 05  | 4  | 1   | 0     | 16     |                  |
| 2 | SA2-4 | 5-51     | 90        | 2  | 16  | 2  | 1   | 0     | 16     |                  |
| 2 | SA6-1 | 7-81     | 99        | 0  | 01  | 1  | 0   | 0     |        | not functional   |
| 2 | SB7-4 | 7-81     | 86        | 5  | 24  | 2  | 1   | 1     |        | not functional   |
| 3 | Wi-22 | 1-18     | 93        | 4  | 14  | 4  | 0   | 2     | 16     |                  |
| 3 | Wi-27 | 1-18     | 91        | 4  | 35  | 6  | 0   | 1     | 16     | related to Wi-22 |
| 3 | Wi-16 | 1-3      | 95        | 3  | 04  | 4  | 0   | 0     | 12     |                  |
| 3 | Wi-6V | 3-15     | 98        | 0  | 01  | 2  | 0   | 0     | 13     |                  |
| 3 | Wi-54 | 3-48     | 91        | 7  | 013 | 2  | 0   | 0     | 16     |                  |
| 3 | Wi-48 | 3-53     | 95        | 4  | 13  | 0  | 0   | 0     | 13     |                  |

B shows the remaining data grouped by their patient's origin

| patient | VH<br>germline<br>gene | homology<br>(% to<br>germline) | CDR FR |     |   |     | CDR3<br>length<br>(amino<br>acids) | annotation |                     |
|---------|------------------------|--------------------------------|--------|-----|---|-----|------------------------------------|------------|---------------------|
|         |                        |                                | R      | SR  | S | E/D |                                    |            |                     |
| 3       | Wi-50 3-53             | 91                             | 4      | 17  | 5 | 0   | 0                                  | 12         |                     |
| 3       | Wi-11V 3-53            | 96                             | 4      | 14  | 1 | 0   | 0                                  | 13         |                     |
| 3       | Wi-9V 3-7              | 97                             | 2      | 12  | 1 | 0   | 0                                  | 13         |                     |
| 3       | Wi-49 3-9              | 100                            | 0      | 00  | 0 | 0   | 0                                  | 16         |                     |
| 3       | Wi-31V 4-30            | 91                             | 7      | 25  | 3 | 1   | 1                                  | 14         |                     |
| 3       | Wi-34V 4-30            | 100                            | 0      | 00  | 0 | 0   | 0                                  | 12         |                     |
| 3       | Wi-61 4-31             | 90                             | 6      | 113 | 6 | 0   | 1                                  | 12         |                     |
| 3       | Wi-63 4-39             | 96                             | 3      | 14  | 1 | 1   | 0                                  | 12         |                     |
| 3       | Wi-64 4-4              | 96                             | 1      | 14  | 1 | 0   | 0                                  | 15         |                     |
| 3       | Wi-16V 4-4             | 100                            | 0      | 00  | 0 | 0   | 0                                  | 17         |                     |
| 4       | Ro85 1-46              | 94                             | 4      | 15  | 4 | 0   | 3                                  | 16         | related to<br>Ro89  |
| 4       | Ro89 1-46              | 92                             | 6      | 26  | 5 | 1   | 3                                  | 16         | related to<br>Ro85  |
| 4       | Ro99 1-69              | 88                             | 3      | 215 | 0 | 2   | 0                                  | 20         | not functional      |
| 4       | Ro101 1-8              | 91                             | 5      | 110 | 4 | 1   | 2                                  | 26         | related to<br>Ro151 |
| 4       | Ro151 1-8              | 89                             | 7      | 013 | 7 | 1   | 2                                  | 26         | related to<br>Ro101 |
| 4       | Ro92 2-5               | 95                             | 5      | 02  | 4 | 0   | 0                                  | 15         |                     |
| 4       | Ro119 2-5              | 90                             | 3      | 010 | 9 | 0   | 0                                  | 19         |                     |
| 4       | Ro22 3-9               | 93                             | 2      | 211 | 2 | 0   | 0                                  | 13         |                     |
| 4       | Ro45 3-53              | 100                            | 0      | 00  | 0 | 0   | 0                                  | 10         |                     |
| 4       | Ro34 3-53              | 91                             | 3      | 26  | 6 | 0   | 0                                  | 20         |                     |
| 4       | Ro38 3-21              | 93                             | 5      | 25  | 4 | 0   | 1                                  | 13         |                     |
| 4       | Ro24 3-48              | 88                             | 6      | 312 | 2 | 1   | 3                                  | 13         |                     |
| 4       | Ro47 3-9               | 88                             | 2      | 416 | 7 | 0   | 0                                  | 13         |                     |
| 4       | Ro114 3-11             | 93                             | 3      | 13  | 9 | 0   | 2                                  | 13         |                     |
| 4       | Ro179 3-33             | 95                             | 2      | 23  | 5 | 0   | 0                                  | 18         |                     |
| 4       | Ro75 4-4               | 96                             | 1      | 04  | 4 | 0   | 0                                  | 12         |                     |
| 4       | Ro132 4-39             | 100                            | 0      | 01  | 0 | 0   | 0                                  | 13         | related to<br>Ro131 |
| 4       | Ro131 4-39             | 97                             | 2      | 13  | 1 | 0   | 0                                  | 13         | related to<br>Ro132 |
| 4       | Ro133 4-39             | 89                             | 5      | 212 | 7 | 0   | 0                                  | 18         |                     |
| 4       | Ro230 4-61             | 93                             | 5      | 16  | 5 | 1   | 0                                  | 15         |                     |
| 4       | Ro13 5-a03             | 96                             | 2      | 14  | 2 | 0   | 0                                  | 19         |                     |
| 5       | Ko76 1-8               | 93                             | 3      | 19  | 4 | 0   | 1                                  | 12         | related to<br>Ko81  |

B shows the remaining data grouped by their patient's origin

| patient | VH<br>germline<br>gene | homology<br>(% to<br>germline) | CDR FR |    |     |     | CDR3<br>length<br>(amino<br>acids) | annotation |    |                     |
|---------|------------------------|--------------------------------|--------|----|-----|-----|------------------------------------|------------|----|---------------------|
|         |                        |                                | R      | SR | S   | E/D |                                    |            |    |                     |
| 5       | Ko81                   | 1-8                            | 89     | 7  | 211 | 5   | 0                                  | 1          | 12 | related to<br>Ko76  |
| 5       | Ko77                   | 1-69                           | 93     | 4  | 26  | 6   | 0                                  | 0          | 16 |                     |
| 5       | Ko158                  | 1-8                            | 98     | 2  | 00  | 4   | 0                                  | 1          | 18 | related to<br>Ko198 |
| 5       | Ko198                  | 1-8                            | 97     | 3  | 01  | 3   | 0                                  | 1          | 18 | related to<br>Ko158 |
| 5       | Ko166                  | 1-69                           | 95     | 6  | 04  | 3   | 2                                  | 0          | 15 |                     |
| 5       | Ko169                  | 1-18                           | 93     | 5  | 37  | 2   | 2                                  | 0          | 19 |                     |
| 5       | Ko197                  | 1-8                            | 97     | 2  | 02  | 4   | 0                                  | 1          | 10 |                     |
| 5       | Ko1162                 | 5                              | 97     | 2  | 13  | 3   | 1                                  | 0          | 13 |                     |
| 5       | Ko1182                 | 70                             |        |    |     |     |                                    | -          |    | not functional      |
| 5       | Ko170                  | 2-5                            | 95     | 3  | 16  | 3   | 0                                  | 0          | 13 |                     |
| 5       | Ko10                   | 3-21                           | 93     | 5  | 36  | 2   | 1                                  | 1          | 18 |                     |
| 5       | Ko22                   | 3-9                            | 96     | 0  | 04  | 4   | 0                                  | 0          | 10 |                     |
| 5       | Ko202                  | 3-11                           | 94     | 5  | 23  | 3   | 1                                  | 2          | 19 |                     |
| 5       | Ko203                  | 3-21                           | 90     | 6  | 110 | 5   | 1                                  | 1          | 14 |                     |
| 5       | Ko204                  | 3-21                           | 94     | 6  | 15  | 1   | 1                                  | 1          | 14 |                     |
| 5       | Ko207                  | 3-49                           | 99     | 0  | 02  | 0   | 0                                  | 0          | 23 |                     |
| 5       | Ko47                   | 4-61                           | 93     | 5  | 07  | 5   | 0                                  | 1          | 22 |                     |
| 5       | Ko152                  | 4-30                           | 96     | 1  | 14  | 3   | 0                                  | 0          | 12 | related to<br>Ko155 |
| 5       | Ko155                  | 4-30                           | 95     | 2  | 16  | 3   | 0                                  | 0          | 12 | related to<br>Ko152 |
| 5       | Ko123                  | 5-51                           | 100    | 0  | 01  | 0   | 0                                  | 0          | 9  |                     |
| 5       | Ko176                  | 5-51                           | 95     | 2  | 36  | 2   | 0                                  | 0          | 18 |                     |
| 6       | Scy13                  | 9                              |        |    |     |     |                                    |            |    |                     |
| 6       | 9                      | 1-69                           | 95     | 3  | 05  | 5   | 1                                  | 0          | 17 |                     |
| 6       | Scy14                  | 1                              |        |    |     |     |                                    |            |    |                     |
| 6       | 1                      | 1-3                            | 96     | 5  | 03  | 1   | 0                                  | 0          | 20 |                     |
| 6       | Scy14                  | 2                              |        |    |     |     |                                    |            |    |                     |
| 6       | 2                      | 1-46                           |        |    |     |     |                                    | -          | -  | frameshift          |
| 6       | Scy13                  | 2                              |        |    |     |     |                                    |            |    |                     |
| 6       | 2                      | 1-3                            | 93     | 4  | 18  | 5   | 1                                  | 1          | 11 |                     |
| 6       | Scy16                  | 3                              |        |    |     |     |                                    |            |    |                     |
| 6       | 3                      | 2-70                           | 100    | 0  | 00  | 0   | 0                                  | 0          | 19 |                     |
| 6       | Scy60                  | 3-48                           | 95     | 4  | 06  | 1   | 1                                  | 0          | 20 |                     |
| 6       | Scy03                  | 3-74                           | 92     | 6  | 23  | 4   | 0                                  | 1          | 10 |                     |
| 6       | Scy53                  | 3-11                           | 94     | 3  | 15  | 6   | 1                                  | 0          | 11 |                     |
| 6       | Scy01                  | 3-11                           | 100    | 0  | 00  | 1   | 0                                  | 0          | 12 |                     |
| 6       | Scy08                  | 3-11                           | 98     | 0  | 02  | 3   | 0                                  | 0          | 13 |                     |
| 6       | Scy17                  | 3-43                           | 91     | 4  | 29  | 4   | 2                                  | 0          | 11 |                     |
| 6       | Scy50                  | 3-33                           | 98     | 1  | 12  | 1   | 1                                  | 0          | 11 | not functional      |

B shows the remaining data grouped by their patient's origin

| patient | VH<br>germline<br>gene | homology<br>(% to<br>germline) | CDR FR |    |    |     | CDR3<br>length<br>(amino<br>acids) | annotation |    |                     |
|---------|------------------------|--------------------------------|--------|----|----|-----|------------------------------------|------------|----|---------------------|
|         |                        |                                | R      | SR | S  | E/D |                                    |            |    |                     |
| 6       | Scy61                  | 3-33                           | 96     | 5  | 03 | 3   | 0                                  | 1          | 16 |                     |
| 6       | Scy12                  | 3-49                           | 97     | 0  | 26 | 0   | 0                                  | 0          | 20 | not functional      |
| 6       | Scy59                  | 3-49                           | 93     | 5  | 03 | 6   | 1                                  | 0          | 14 |                     |
| 6       | Scy64                  | 3-23                           | 90     | 3  | 08 | 9   | 1                                  | 1          | 14 | related to<br>Scy07 |
| 6       | Scy65                  | 3-64                           | 98     | 1  | 04 | 1   | 0                                  | 0          | 8  |                     |
| 6       | Scy69                  | 4-39                           | 95     | 5  | 06 | 2   | 0                                  | 0          | 21 |                     |
| 6       | Scy73                  | 4-39                           | 99     | 1  | 01 | 0   | 0                                  | 0          | 17 |                     |
| 6       | Scy10                  | 4-39                           | 96     | 4  | 04 | 1   | 1                                  | 0          | 12 |                     |
| 6       | Scy12                  | 4-4                            | 95     | 2  | 16 | 2   | 0                                  | 0          | 11 | not functional      |
| 6       | Scy16                  | 6-1                            | 99     | 1  | 00 | 1   | 0                                  | 0          | 25 |                     |
| 6       | Scy17                  | 6-1                            | 95     | 4  | 16 | 2   | 1                                  | 1          | 12 |                     |

Germline gene and homology indicate the percentage of identical nucleic acids compared to the respective germline gene. The total number of replacement (R) and silent (S) mutations within the complementarity determining region (CDR) and the framework region (FR) as well as the number of replacement mutations leading to aspartate (D) or glutamate (E) as well as to arginin (R), histidine (H) or lysin (K) are listed. The CDR3 length is given in amino acid numbers. In the annotation non-functional genes (*i.e.* genes with a non-translatable reading frame) are indicated.
